# Supplementary material for: Chronic complement dysregulation drives neuroinflammation after traumatic brain injury: a transcriptomic study
Source: PubMed Central journal article supplement (PMC8287781; doi:10.1186/s40478-021-01226-2), 2021-07-19
Supplement: 40478_2021_1226_MOESM3_ESM.pdf [file 40478_2021_1226_MOESM3_ESM.pdf]

# Diagram: Complement Gene Expression in TBI Brains Compared to Naïve Brains

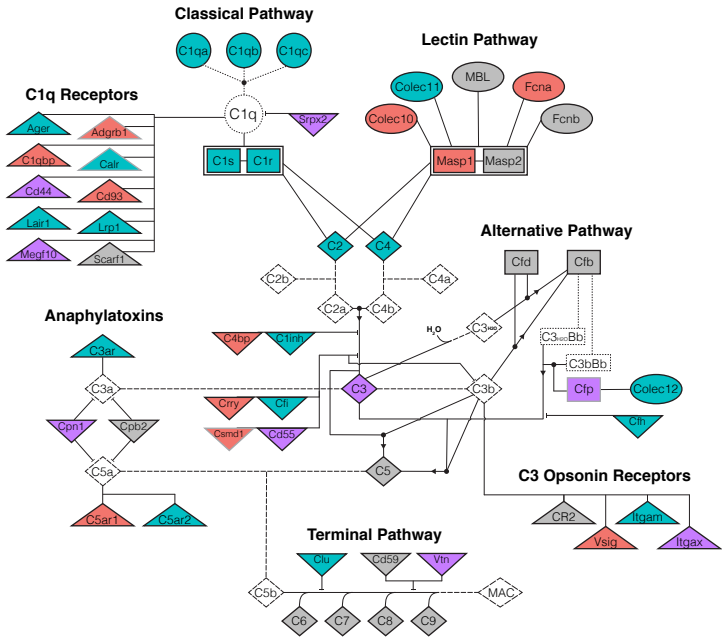

## Legend

### Shape: Complement Protein Class

- Pattern Recognition Molecule
- Enzyme-Activator
- ▲ Receptor
- ◆ Enzymatic Target
- ▼ Regulatory

### Fill Color: Time Point of Highest Absolute Fold Change

- Day 3
- Day 7
- Day 28
- Not Significant

### Border Color

- Upregulated
- Downregulated

### Linetype

- Interacts with
- Produces
- ..... Combines into

## Note on C1q Receptors

C1q receptors have been shown to bind to molecules other than C1q. For example, Lrp1 binds to APOE (PMID: 15182176), RAGE to advanced glycation end-products (AGE), Lair1 to translation initiation and elongation factors (PMID: 32628130), C1qbp to APOA-I (PMID: 28565870), and more. In addition, CD93, shown to influence C1q-mediated functions, was later demonstrated not to bind directly to C1q (PMIDs: 11781389, 11994479).
