# Supplementary material for: Chronic complement dysregulation drives neuroinflammation after traumatic brain injury: a transcriptomic study
Source: PubMed Central journal article supplement (PMC8287781; doi:10.1186/s40478-021-01226-2), 2021-07-19

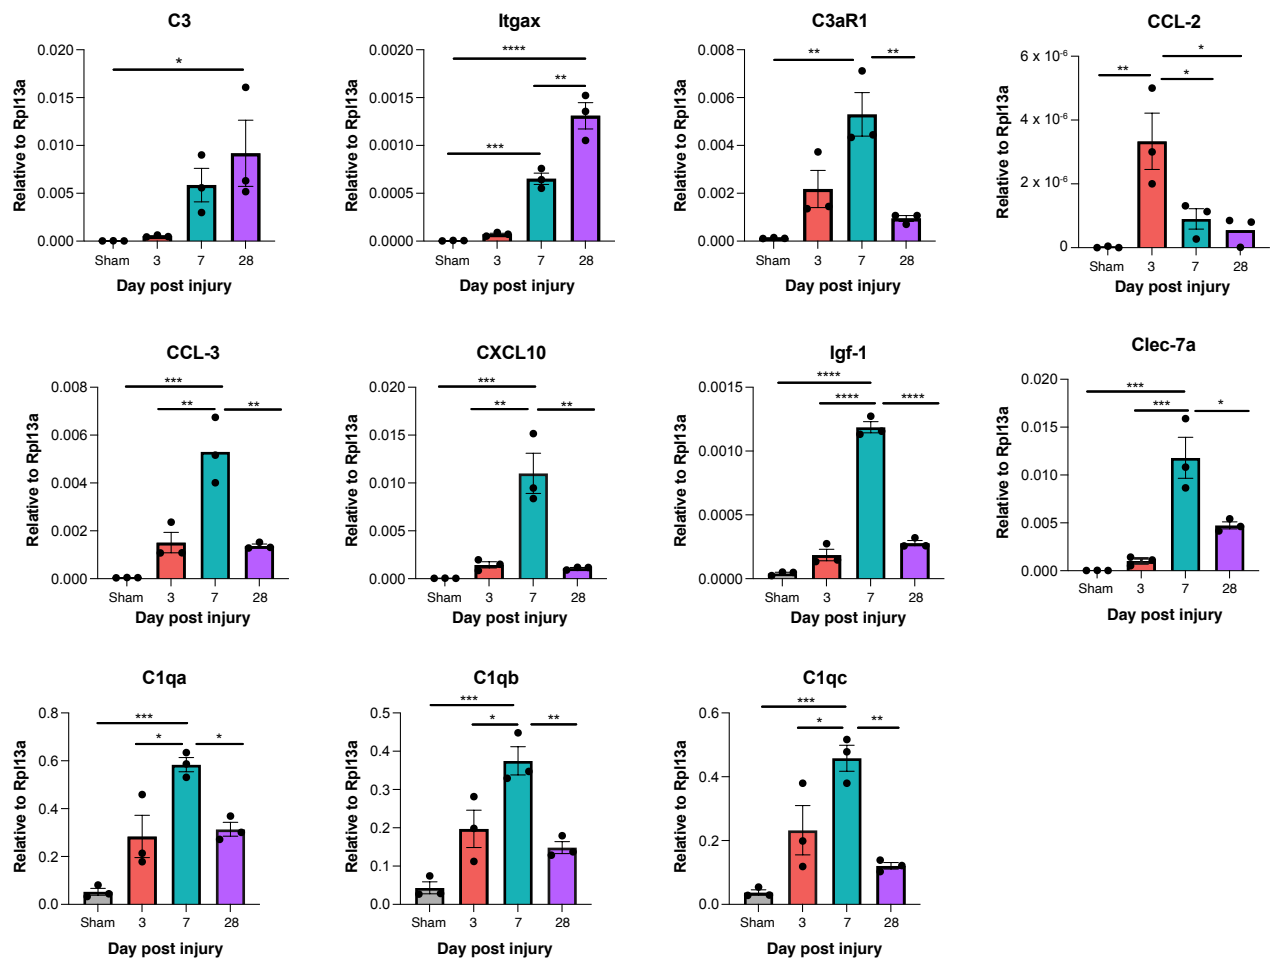

Supplement: 40478_2021_1226_MOESM4_ESM.pdf [file 40478_2021_1226_MOESM4_ESM.pdf]
